# Supplementary material for: Analysis of Retronasal Flavor Alterations in Smoke-Affected Wines and the Efficacy of Various Inter-Stimulus Rinse Protocols in Clearing Smoke-Related Attributes
Source: MDPI journal article supplement (doi:10.3390/beverages8020023), 2022-04-10
Supplement: s1 [file s1]

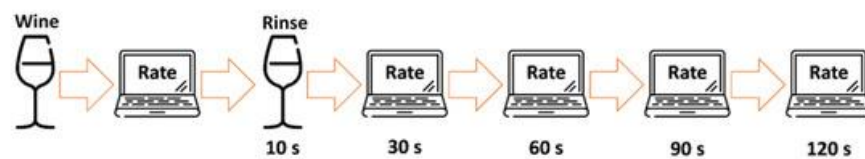

Figure S1: Flowchart of fixed-time point evaluation procedure, as seen in Fryer (2021)

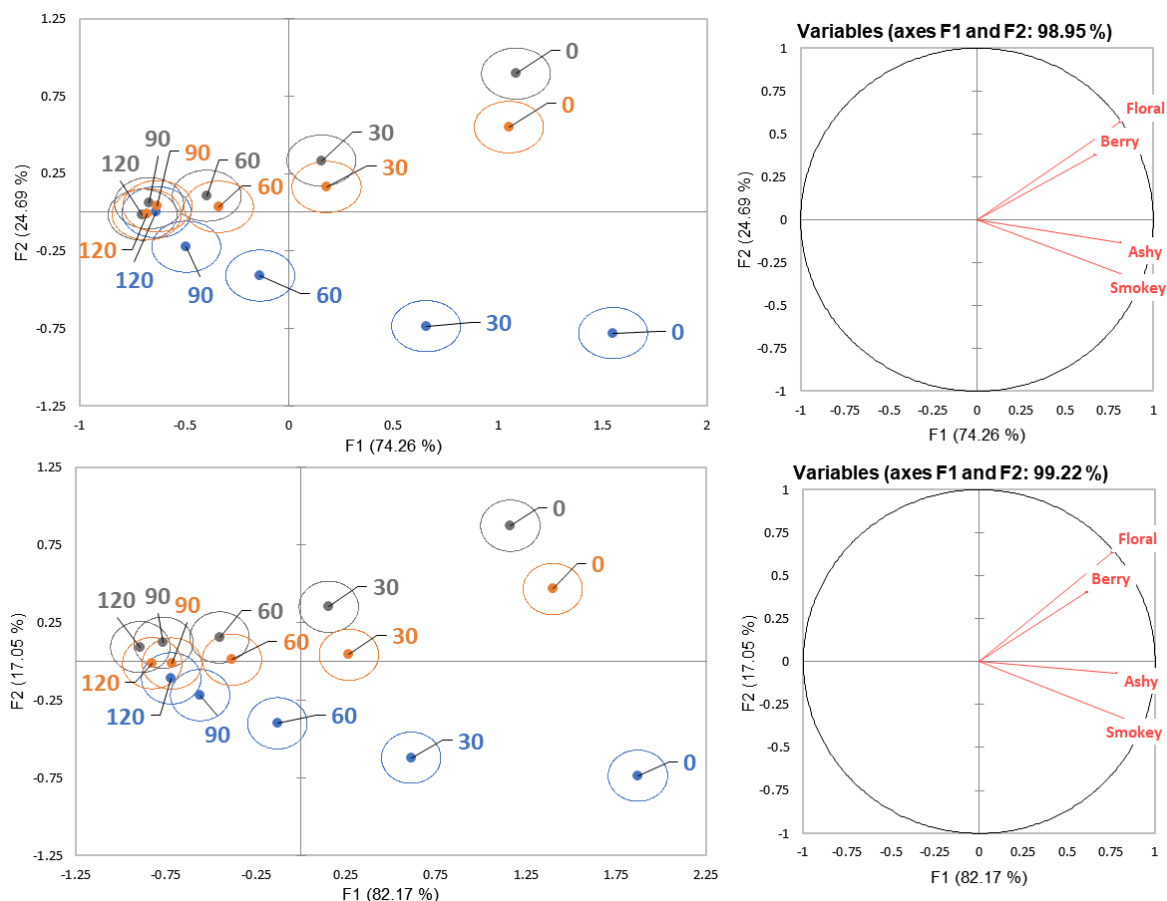

Figure S2: Separation of high smoke phenol (blue), moderate smoke phenol (orange), and low smoke phenol (grey) wines in 30 s intervals based on DA for the ethanol (A) and lipid (B) rinse systems. Ellipses represent a 95% confidence interval around the means

Table S1: Summary of significance of wine and position within set (1, 2, or 3) according to a two-way ANOVA from the intensity ratings at T=0 s for smoke related attributes (Smokey and Ashy)

|               | Pectin |        | Ethanol |        | Lipid |        | Glucose |        |
|---------------|--------|--------|---------|--------|-------|--------|---------|--------|
|               | Ashy   | Smokey | Ashy    | Smokey | Ashy  | Smokey | Ashy    | Smokey |
| Wine          | ***    | ***    | ***     | ***    | ***   | ***    | ***     | ***    |
| Position      | NS     | NS     | NS      | NS     | NS    | NS     | NS      | NS     |
| Wine*Position | NS     | NS     | NS      | NS     | NS    | NS     | NS      | NS     |

(NS) no significance, (^) significance, 0.1, (\*) significance,  $p < 0.05$ , (\*\*) significance,  $p < 0.01$ , (\*\*\*) significance,  $p < 0.001$

Table S2: Summary of significance of rinse according to a MANOVA from the intensity ratings of at T=0 s for all attributes at an  $\alpha=0.05$

|       | High Smoke | Moderate Smoke | Low Smoke |
|-------|------------|----------------|-----------|
| Rinse | NS         | NS             | NS        |
